# Supplementary material for: Evolution of a microbial nitrilase gene family: a comparative and environmental genomics study
Source: PubMed Central journal article supplement (PMC1199592; doi:10.1186/1471-2148-5-42), 2005-08-06
Supplement: 1471-2148-5-42-S1.pdf [file 1471-2148-5-42-S1.pdf]

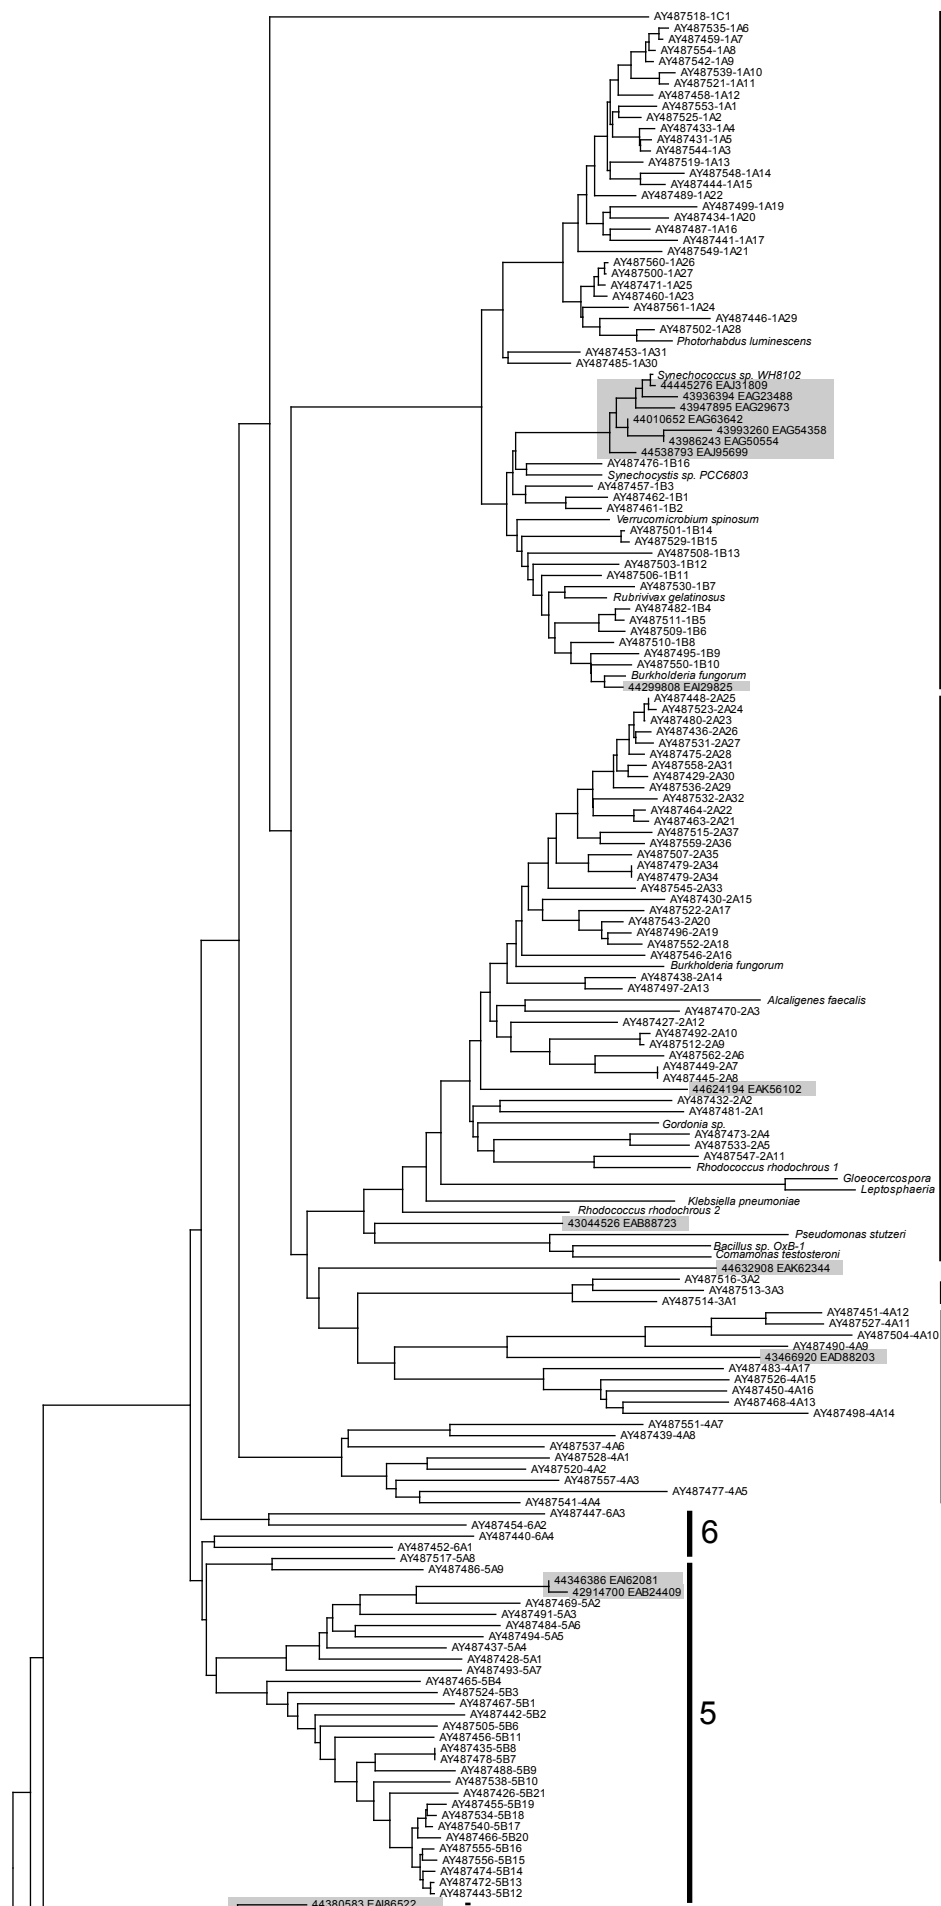

1

2

3

4

6

5

EUKARYA

0.2

44380583 EA68522  
42954752 EAB44356  
44591079 EAK32486

*Arabidopsis thaliana*  
*Oryza sativa*

*Synechococcus* sp. WH8102  
4394276 EAJ31809  
4396394 EAG23488  
43947895 EAG29673  
44010652 EAG63642  
44538793 EAJ95699  
43986243 EAG50554  
43993260 EAG54358

*Synechocystis* sp. PCC6803  
44538793 EAJ95699

*Verrucomicrobium spinosum*  
44538793 EAJ95699

*Rubrivivax gelatinosus*  
44538793 EAJ95699

*Burkholderia fungorum*  
44298008 EAG29825

*Alcaligenes faecalis*  
44298008 EAG29825

*Gordonia* sp.  
44298008 EAG29825

*Rhodococcus rhodochrous* 1  
44298008 EAG29825

*Rhodococcus rhodochrous* 2  
44298008 EAG29825

*Pseudomonas stutzeri*  
44298008 EAG29825

*Bacillus* sp. OxB-1  
44298008 EAG29825

*Comamonas testosteroni*  
44298008 EAG29825

*Gloeocercospora*  
44298008 EAG29825

*Leptosphaeria*  
44298008 EAG29825

*Klebsiella pneumoniae*  
44298008 EAG29825

*Rhodococcus rhodochrous* 1  
44298008 EAG29825

*Rhodococcus rhodochrous* 2  
44298008 EAG29825

*Pseudomonas stutzeri*  
44298008 EAG29825

*Bacillus* sp. OxB-1  
44298008 EAG29825

*Comamonas testosteroni*  
44298008 EAG29825

*Gloeocercospora*  
44298008 EAG29825

*Leptosphaeria*  
44298008 EAG29825

*Klebsiella pneumoniae*  
44298008 EAG29825

*Rhodococcus rhodochrous* 1  
44298008 EAG29825

*Rhodococcus rhodochrous* 2  
44298008 EAG29825

*Pseudomonas stutzeri*  
44298008 EAG29825

*Bacillus* sp. OxB-1  
44298008 EAG29825

*Comamonas testosteroni*  
44298008 EAG29825

*Gloeocercospora*  
44298008 EAG29825

*Leptosphaeria*  
44298008 EAG29825

*Klebsiella pneumoniae*  
44298008 EAG29825

*Rhodococcus rhodochrous* 1  
44298008 EAG29825

*Rhodococcus rhodochrous* 2  
44298008 EAG29825

*Pseudomonas stutzeri*  
44298008 EAG29825

*Bacillus* sp. OxB-1  
44298008 EAG29825

*Comamonas testosteroni*  
44298008 EAG29825

*Gloeocercospora*  
44298008 EAG29825

*Leptosphaeria*  
44298008 EAG29825
