# Supplementary material for: Evolution of a microbial nitrilase gene family: a comparative and environmental genomics study
Source: PubMed Central journal article supplement (PMC1199592; doi:10.1186/1471-2148-5-42), 2005-08-06

Nit1C ORF 3  
 COG2516: Biotin synthase-related enzyme  
 PF04055 Radical SAM superfamily

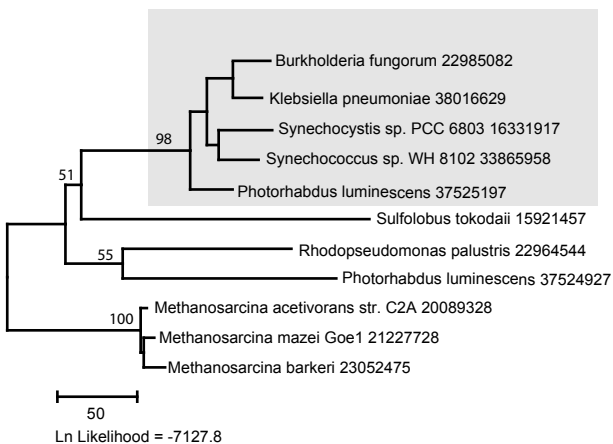

Nit1C ORF 4  
 COG0454: Histone acetyltransferase HPA2 and related  
 PF00583 Acetyltransferase (GNAT) family

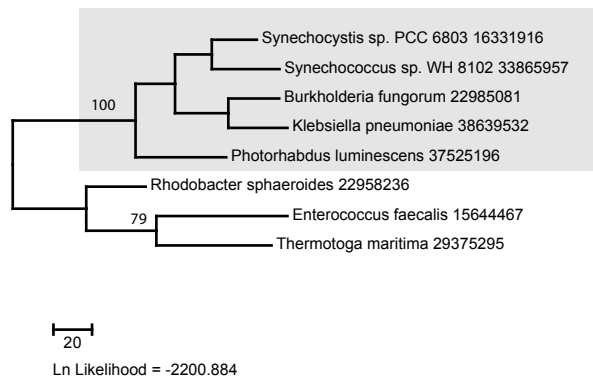

Nit1C ORF 5  
 COG2144, PF00586 (AIRS)  
 AIR synthase, selenophosphate synthase

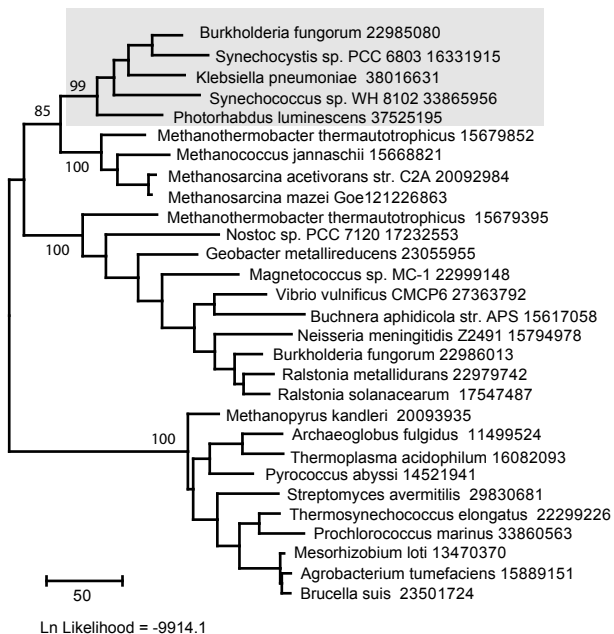

Nit1C ORF 7  
 COG 2072, PF00070  
 pyridine nucleotide-disulphide oxidoreductase

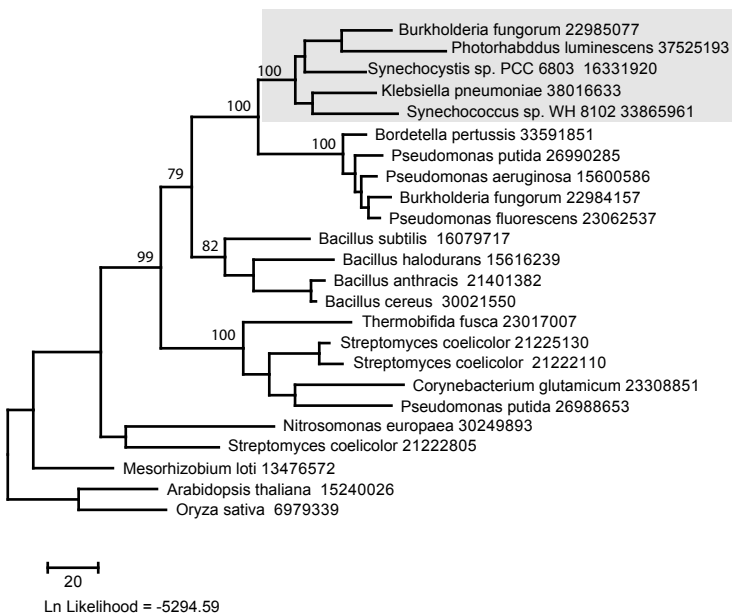

Supplement: 1471-2148-5-42-S2.pdf [file 1471-2148-5-42-S2.pdf]
