# Supplementary material for: Evolution of a microbial nitrilase gene family: a comparative and environmental genomics study
Source: PubMed Central journal article supplement (PMC1199592; doi:10.1186/1471-2148-5-42), 2005-08-06
Supplement: 1471-2148-5-42-S3.pdf [file 1471-2148-5-42-S3.pdf]

PF01047: MarR transcriptional regulator  
 COG1846: MarR transcriptional regulator

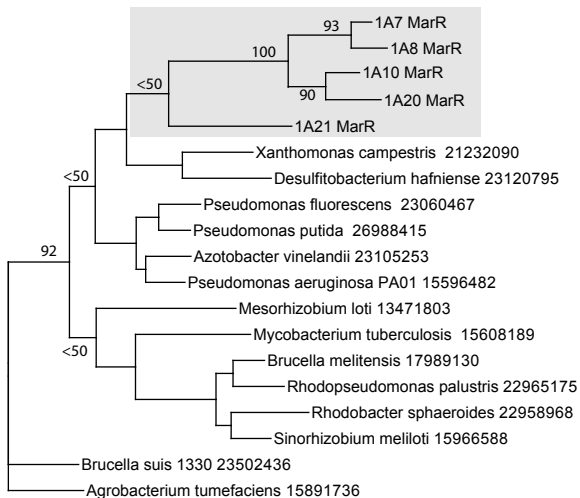

Ln Likelihood = -3711.40

PF01370: NAD dependent epimerase/dehydratase  
 COG0702: Predicted nucleoside-diphosphate-sugar epimerases

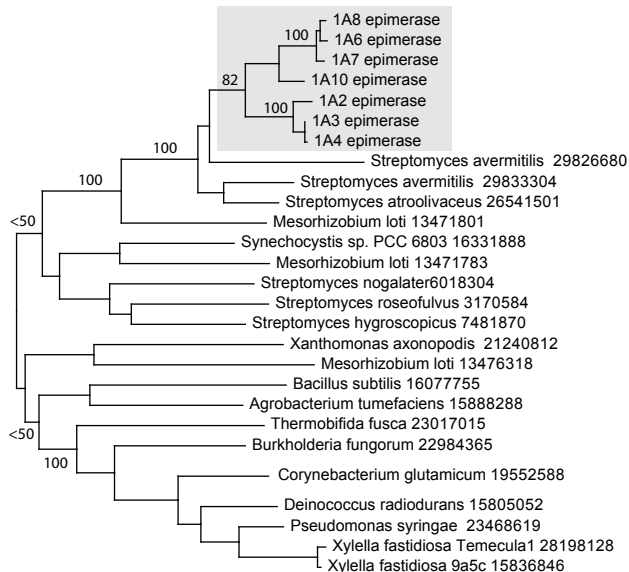

Ln Likelihood = -11080.81284
